# Supplementary material
Source: MDPI journal article supplement (https://www.mdpi.com/1099-4300/23/12/1557)
Supplement: s1 [file s1]

**Thermodynamic properties of the first generation hybrid dendrimer with  
"carbosilane core / phenylene shell" structure**

**Supplementary Material**

**Table S1.** The experimental molar heat capacity of the first generation hybrid dendrimer G1{Si}<sub>13</sub>[Ar]<sub>32</sub> ( $M(C_{304}H_{332}Si_{13}) = 4350.95 \text{ g mol}^{-1}$ ) at  $p^\circ = 0.1 \text{ MPa}^a$

| $T / \text{K}$        | $C_{p,m} / \text{J K}^{-1} \text{mol}^{-1}$ | $T / \text{K}$ | $C_{p,m} / \text{J K}^{-1} \text{mol}^{-1}$ | $T / \text{K}$       | $C_{p,m} / \text{J K}^{-1} \text{mol}^{-1}$ |
|-----------------------|---------------------------------------------|----------------|---------------------------------------------|----------------------|---------------------------------------------|
| <i>Series 1 (AC)*</i> |                                             | 16.79          | 275.8                                       | 65.40                | 1471                                        |
| 6.36                  | 38.4                                        | 17.20          | 287.6                                       | 66.91                | 1510                                        |
| 6.47                  | 39.9                                        | 17.54          | 298.3                                       | 68.80                | 1544                                        |
| 6.61                  | 42.0                                        | 18.06          | 313.5                                       | 70.65                | 1590                                        |
| 6.78                  | 44.5                                        | 18.47          | 325.7                                       | 72.71                | 1634                                        |
| 7.01                  | 47.7                                        | 18.92          | 342.9                                       | 75.18                | 1692                                        |
| 7.16                  | 49.8                                        | 19.46          | 354.2                                       | 77.66                | 1749                                        |
| 7.37                  | 52.5                                        | 19.91          | 366.4                                       | 80.15                | 1801                                        |
| 7.59                  | 55.6                                        | 20.77          | 389.9                                       | 82.66                | 1852                                        |
| 7.78                  | 58.2                                        | 22.03          | 426.3                                       | 84.43                | 1888                                        |
| 7.97                  | 60.6                                        | 23.34          | 462.4                                       | <i>Series 2 (AC)</i> |                                             |
| 8.18                  | 63.5                                        | 24.69          | 499.8                                       | 83.27                | 1863                                        |
| 8.43                  | 67.3                                        | 26.12          | 538.7                                       | 85.51                | 1914                                        |
| 8.59                  | 69.8                                        | 27.40          | 573.5                                       | 86.70                | 1941                                        |
| 8.82                  | 73.4                                        | 28.81          | 612.6                                       | 88.93                | 1984                                        |
| 8.98                  | 75.9                                        | 30.17          | 650.2                                       | 89.22                | 1989                                        |
| 9.25                  | 80.3                                        | 31.56          | 689.1                                       | 91.75                | 2036                                        |
| 9.46                  | 84.0                                        | 33.01          | 728.7                                       | 92.41                | 2049                                        |
| 9.64                  | 87.4                                        | 34.42          | 764.8                                       | 95.89                | 2124                                        |
| 9.90                  | 92.5                                        | 36.13          | 810.4                                       | 99.36                | 2184                                        |
| 10.05                 | 95.6                                        | 37.45          | 847.2                                       | 102.84               | 2253                                        |
| 10.38                 | 103                                         | 38.95          | 883.2                                       | 106.33               | 2311                                        |
| 10.74                 | 111                                         | 40.46          | 924.1                                       | 109.82               | 2371                                        |
| 11.15                 | 121                                         | 42.04          | 960.8                                       | 111.50               | 2403                                        |
| 11.61                 | 132                                         | 43.55          | 996.2                                       | 114.89               | 2454                                        |
| 11.77                 | 136                                         | 45.16          | 1035                                        | 118.30               | 2510                                        |
| 11.92                 | 140                                         | 46.65          | 1068                                        | 121.71               | 2567                                        |
| 12.25                 | 148                                         | 48.17          | 1100                                        | 123.80               | 2606                                        |
| 12.63                 | 159                                         | 49.74          | 1137                                        | 127.29               | 2664                                        |
| 13.04                 | 170                                         | 51.32          | 1173                                        | 130.80               | 2722                                        |
| 13.46                 | 181                                         | 52.93          | 1206                                        | 134.31               | 2781                                        |
| 13.87                 | 193                                         | 54.50          | 1238                                        | 137.83               | 2834                                        |
| 14.20                 | 202                                         | 56.11          | 1273                                        | 141.38               | 2896                                        |
| 14.69                 | 215                                         | 57.68          | 1306                                        | 144.90               | 2946                                        |

|       |       |       |      |        |      |
|-------|-------|-------|------|--------|------|
| 15.10 | 227   | 59.29 | 1345 | 148.42 | 3007 |
| 15.59 | 240.8 | 60.90 | 1375 | 151.94 | 3069 |
| 15.94 | 251.0 | 62.47 | 1409 | 155.46 | 3127 |
| 16.33 | 262.4 | 64.13 | 1445 | 158.98 | 3189 |

**Table S1** – *Continued*

| $T / \text{K}$ | $C_{p,m} / \text{J K}^{-1} \text{mol}^{-1}$ | $T / \text{K}$                    | $C_{p,m} / \text{J K}^{-1} \text{mol}^{-1}$ | $T / \text{K}$ | $C_{p,m} / \text{J K}^{-1} \text{mol}^{-1}$ |
|----------------|---------------------------------------------|-----------------------------------|---------------------------------------------|----------------|---------------------------------------------|
| 162.51         | 3255                                        | 319.40                            | 6213                                        | 440.3          | 8558                                        |
| 166.04         | 3311                                        | 320.36                            | 6357                                        | 443.3          | 8582                                        |
| 169.57         | 3367                                        | 321.66                            | 6796                                        | 446.3          | 8606                                        |
| 173.12         | 3430                                        | 322.97                            | 7284                                        | 449.3          | 8630                                        |
| 176.67         | 3489                                        | 326.56                            | 7469                                        | 452.3          | 8654                                        |
| 180.23         | 3549                                        | 330.23                            | 7535                                        | 455.3          | 8678                                        |
| 183.79         | 3605                                        | 333.92                            | 7562                                        | 458.3          | 8702                                        |
| 187.35         | 3667                                        | 337.60                            | 7601                                        | 461.3          | 8725                                        |
| 190.93         | 3723                                        | 341.30                            | 7648                                        | 464.3          | 8748                                        |
| 194.51         | 3778                                        | 344.99                            | 7689                                        | 467.3          | 8771                                        |
| 198.19         | 3836                                        | 345.59                            | 7696                                        | 470.3          | 8794                                        |
| 201.79         | 3886                                        | 348.09                            | 7718                                        | 473.3          | 8817                                        |
| 205.38         | 3952                                        | 350.58                            | 7743                                        | 476.3          | 8840                                        |
| 208.99         | 3998                                        | <i>Series 3 (DSC)<sup>b</sup></i> |                                             | 479.3          | 8863                                        |
| 212.59         | 4057                                        | 350.3                             | 7736                                        | 482.3          | 8885                                        |
| 216.21         | 4121                                        | 353.3                             | 7767                                        | 485.3          | 8907                                        |
| 219.83         | 4184                                        | 356.3                             | 7798                                        | 488.3          | 8929                                        |
| 223.46         | 4260                                        | 359.3                             | 7828                                        | 491.3          | 8951                                        |
| 227.10         | 4334                                        | 362.3                             | 7858                                        | 494.3          | 8973                                        |
| 230.71         | 4393                                        | 365.3                             | 7887                                        | 497.3          | 8995                                        |
| 234.35         | 4461                                        | 368.3                             | 7917                                        | 500.3          | 9016                                        |
| 238.01         | 4520                                        | 371.3                             | 7946                                        | 503.3          | 9038                                        |
| 241.67         | 4582                                        | 374.3                             | 7975                                        | 506.3          | 9059                                        |
| 245.34         | 4643                                        | 377.3                             | 8003                                        | 509.3          | 9081                                        |
| 249.02         | 4678                                        | 380.3                             | 8032                                        | 512.3          | 9102                                        |
| 252.70         | 4741                                        | 383.3                             | 8060                                        | 515.3          | 9123                                        |
| 256.56         | 4815                                        | 386.3                             | 8088                                        | 518.3          | 9143                                        |
| 260.25         | 4897                                        | 389.3                             | 8116                                        | 521.3          | 9164                                        |
| 263.95         | 4956                                        | 392.3                             | 8143                                        | 524.3          | 9185                                        |
| 267.65         | 5037                                        | 395.3                             | 8171                                        | 527.3          | 9205                                        |
| 271.36         | 5091                                        | 398.3                             | 8198                                        | 530.3          | 9226                                        |
| 275.07         | 5186                                        | 401.3                             | 8225                                        | 533.3          | 9246                                        |
| 278.76         | 5275                                        | 404.3                             | 8251                                        | 536.3          | 9266                                        |
| 282.47         | 5339                                        | 407.3                             | 8278                                        | 539.3          | 9286                                        |
| 286.17         | 5415                                        | 410.3                             | 8304                                        | 542.3          | 9306                                        |
| 289.87         | 5494                                        | 413.3                             | 8330                                        | 545.3          | 9326                                        |
| 293.56         | 5584                                        | 416.3                             | 8356                                        | 548.3          | 9345                                        |

|        |      |       |      |       |      |
|--------|------|-------|------|-------|------|
| 297.25 | 5659 | 419.3 | 8382 | 551.3 | 9365 |
| 300.95 | 5721 | 422.3 | 8408 | 554.3 | 9385 |
| 304.62 | 5801 | 425.3 | 8433 | 557.3 | 9404 |
| 308.28 | 5896 | 428.3 | 8458 | 560.3 | 9423 |
| 310.25 | 5918 | 431.3 | 8484 | 563.3 | 9442 |
| 311.93 | 5943 | 434.3 | 8508 | 566.3 | 9461 |
| 315.76 | 6019 | 437.3 | 8533 | 569.3 | 9480 |

**Table S1** – *Continued*

| $T / K$               | $C_{p,m} / J K^{-1} mol^{-1}$ | $T / K$ | $C_{p,m} / J K^{-1} mol^{-1}$ | $T / K$ | $C_{p,m} / J K^{-1} mol^{-1}$ |
|-----------------------|-------------------------------|---------|-------------------------------|---------|-------------------------------|
| 572.3                 | 9499                          | 413.5   | 8332                          | 509.5   | 9082                          |
| 575.3                 | 9518                          | 416.5   | 8358                          | 512.5   | 9103                          |
| 578.3                 | 9537                          | 419.5   | 8384                          | 515.5   | 9124                          |
| 581.3                 | 9555                          | 422.5   | 8410                          | 518.5   | 9145                          |
| 584.3                 | 9574                          | 425.5   | 8435                          | 521.5   | 9166                          |
| 587.3                 | 9592                          | 428.5   | 8460                          | 524.5   | 9186                          |
| 590.3                 | 9611                          | 431.5   | 8485                          | 527.5   | 9207                          |
| 593.3                 | 9629                          | 434.5   | 8510                          | 530.5   | 9226                          |
| 596.3                 | 9647                          | 437.5   | 8535                          | 533.5   | 9247                          |
| 599.3                 | 9665                          | 440.5   | 8559                          | 536.5   | 9267                          |
| 600.3                 | 9671                          | 443.5   | 8584                          | 539.5   | 9287                          |
| <i>Series 4 (DSC)</i> |                               | 446.5   | 8608                          | 542.5   | 9307                          |
| 353.5                 | 7769                          | 449.5   | 8632                          | 545.5   | 9327                          |
| 356.5                 | 7800                          | 452.5   | 8656                          | 548.5   | 9346                          |
| 359.5                 | 7830                          | 455.5   | 8680                          | 551.5   | 9366                          |
| 362.5                 | 7859                          | 458.5   | 8703                          | 554.5   | 9386                          |
| 365.5                 | 7889                          | 461.5   | 8727                          | 557.5   | 9405                          |
| 368.5                 | 7918                          | 464.5   | 8750                          | 560.5   | 9424                          |
| 371.5                 | 7947                          | 467.5   | 8773                          | 563.5   | 9443                          |
| 374.5                 | 7976                          | 470.5   | 8796                          | 566.5   | 9462                          |
| 377.5                 | 8005                          | 473.5   | 8819                          | 569.5   | 9481                          |
| 380.5                 | 8034                          | 476.5   | 8841                          | 572.5   | 9501                          |
| 383.5                 | 8062                          | 479.5   | 8864                          | 575.5   | 9519                          |
| 386.5                 | 8090                          | 482.5   | 8886                          | 578.5   | 9538                          |
| 389.5                 | 8117                          | 485.5   | 8909                          | 581.5   | 9556                          |
| 392.5                 | 8145                          | 488.5   | 8931                          | 584.5   | 9575                          |
| 395.5                 | 8172                          | 491.5   | 8953                          | 587.5   | 9593                          |
| 398.5                 | 8200                          | 494.5   | 8975                          | 590.5   | 9611                          |
| 401.5                 | 8226                          | 497.5   | 8996                          | 593.5   | 9630                          |
| 404.5                 | 8253                          | 500.5   | 9018                          | 596.5   | 9648                          |
| 407.5                 | 8280                          | 503.5   | 9039                          | 599.5   | 9666                          |
| 410.5                 | 8306                          | 506.5   | 9061                          | 600.5   | 9672                          |

\* AC – adiabatic calorimetry, DSC – differential scanning calorimetry.

<sup>a</sup> The standard uncertainty for pressure  $u(p) = 10$  kPa. The standard uncertainties for temperature  $u(T) = 0.01$  K in the interval of  $T = (6.33\text{--}350.58)$  K,  $u(T) = 0.5$  K in the range of  $T = (350.3\text{--}600.3)$  K. The relative expanded uncertainties for the molar heat capacity  $U_r(C_{p,m}) = 0.02, 0.005, 0.002$ , and  $0.02$  in the intervals of  $T = (6.33\text{--}15.10)$  K,  $T = (15.52\text{--}40.46)$  K,  $T = (41.99\text{--}350.58)$  K, and  $T = (350.3\text{--}600.3)$  K, respectively. The reported expanded uncertainties correspond to the 0.95 level of confidence (coverage factor  $k \approx 2$ ).

<sup>b</sup> The  $C_{p,m}$  values in *Series 3 and 4* (DSC) correspond to the devitrified state of dendrimer. Each third  $C_{p,m}$  value is given.
